# Supplementary material for: A porous Co–Ru@C shell as a bifunctional catalyst for lithium–oxygen batteries
Source: Royal Society of Chemistry journal article supplement (doi:10.1039/c8ra04144j), 2018-01-01
Supplement: c8ra04144j1.pdf [file c8ra04144j1.pdf]

## Supporting Information

### Porous Co-Ru@C Shell as Bifunctional Catalyst for Lithium-Oxygen Batteries

Xiang Chen,<sup>a</sup> Xiuhui Zhang,<sup>b</sup> Chunguang Chen,<sup>b</sup> Tao Huang,<sup>\*a</sup> Aishui Yu<sup>\*ab</sup>

<sup>a</sup>Laboratory of Advanced Materials, Shanghai Key Laboratory of Molecular Catalysis and Innovative Materials, Institute of New Energy, Collaborative Innovation Center of Chemistry for Energy Materials, Fudan University, Shanghai 200433, China.

<sup>b</sup>Department of Chemistry, Shanghai Key Laboratory of Molecular Catalysis and Innovative Materials, Institute of New Energy, Collaborative Innovation Center of Chemistry for Energy Materials, Fudan University, Shanghai 200433, China.

E-mail: asyu@fudan.edu.cn; Fax: +86-21-51630320; Tel: +86-21-51630320.

Table S1. Relative element contents of Co-Ru@C shell from EDS (TEM)

| Element | Weight/% | Atomic/% |
|---------|----------|----------|
| C       | 26.75    | 73.32    |
| Co      | 12.07    | 6.74     |

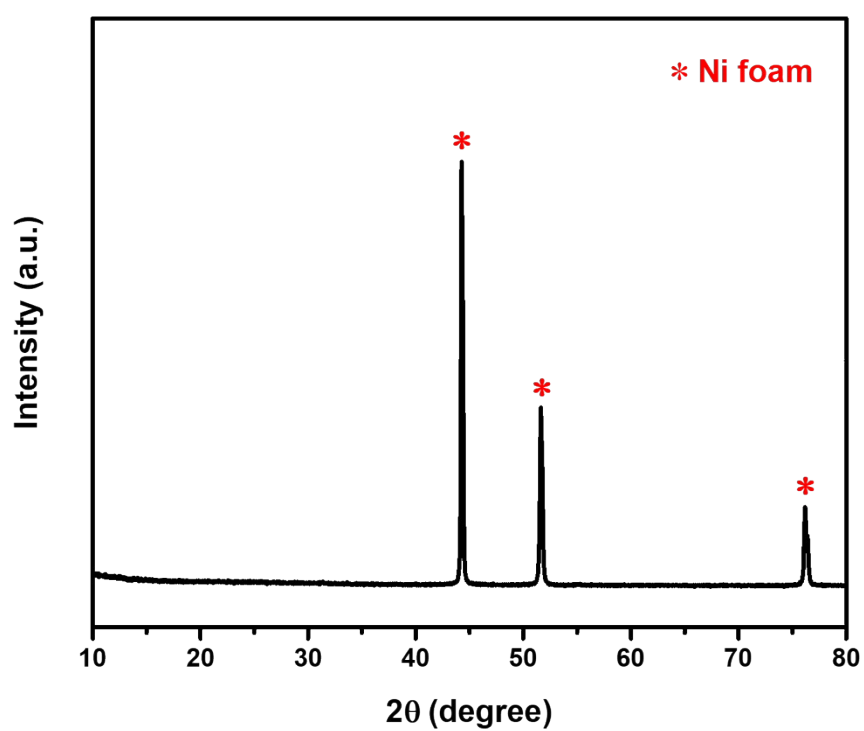

Figure S1. XRD patterns of Co-Ru@C shell electrodes after 1<sup>st</sup> discharge.
